# Supplementary material for: Determining the Impact of the Opioid Crisis on a Tertiary-Care Hospital in Central New York to Identify Critical Areas of Intervention in the Local Community
Source: Hindawi journal article supplement (doi:10.1155/2020/3956187), 2020-03-12
Supplement: f1 [file 3956187.f1.pdf]

Supplemental Table 1. ICD-9 and 10 codes used to identify patients for this study analysis.

|               |                                        |
|---------------|----------------------------------------|
| 304.00–304.03 | Opioid type dependence                 |
| 304.70–304.73 | Combinations of opioids with any other |

|               |                                                  |
|---------------|--------------------------------------------------|
| 305.50–305.53 | Nondependent opioid abuse                        |
| 965.00        | Poisoning by opium                               |
| 965.01        | Poisoning by heroin                              |
| 965.02        | Poisoning by methadone                           |
| 965.09        | Poisoning by other opiates and related narcotics |
| E850.0        | Heroin poisoning                                 |
| E935.0        | Heroin, adverse effects                          |
| <b>Other</b>  |                                                  |
| 304.60–304.63 | Other, specified drug dependence                 |
| 304.90–304.93 | Unspecified drug dependence                      |
| 305.90–305.93 | Other, mixed or unspecified drug abuse           |
| V654.2        | Counseling, substance use                        |

|             |                                                                                                                                                                                                                                                                                                                                                                                                                                                             |
|-------------|-------------------------------------------------------------------------------------------------------------------------------------------------------------------------------------------------------------------------------------------------------------------------------------------------------------------------------------------------------------------------------------------------------------------------------------------------------------|
| ICD10 Codes | 'T40.0X5','T40.0X5A','T40.0X5D','T40.0X5S','T40.0X6','T40.0X6A','T40.0X6D','T40.0X6S','T40.1','T40.1X','T40.1X1','T40.1X1A','T40.1X1D','T40.1X1S','T40.1X2','T40.1X2A','T40.1X2D','T40.1X2S','T40.1X3','T40.1X3A','T40.1X3D','T40','F11.15','F11.150','F11.151','F11.159','F11.18','F11.181','F11.182','F11.188','F11.19','F11.2','F11.20','F11.21','F11.22','F11.220','F11.221','F11.222','F11.229','F11.23','F11.24','F11.25','F11.250','F11.20','F19.20' |
|-------------|-------------------------------------------------------------------------------------------------------------------------------------------------------------------------------------------------------------------------------------------------------------------------------------------------------------------------------------------------------------------------------------------------------------------------------------------------------------|
